# Supplementary material for: Non-trophic interactions strengthen the diversity—functioning relationship in an ecological bioenergetic network model
Source: PubMed Central journal article supplement (PMC6715155; doi:10.1371/journal.pcbi.1007269), 2019-08-29

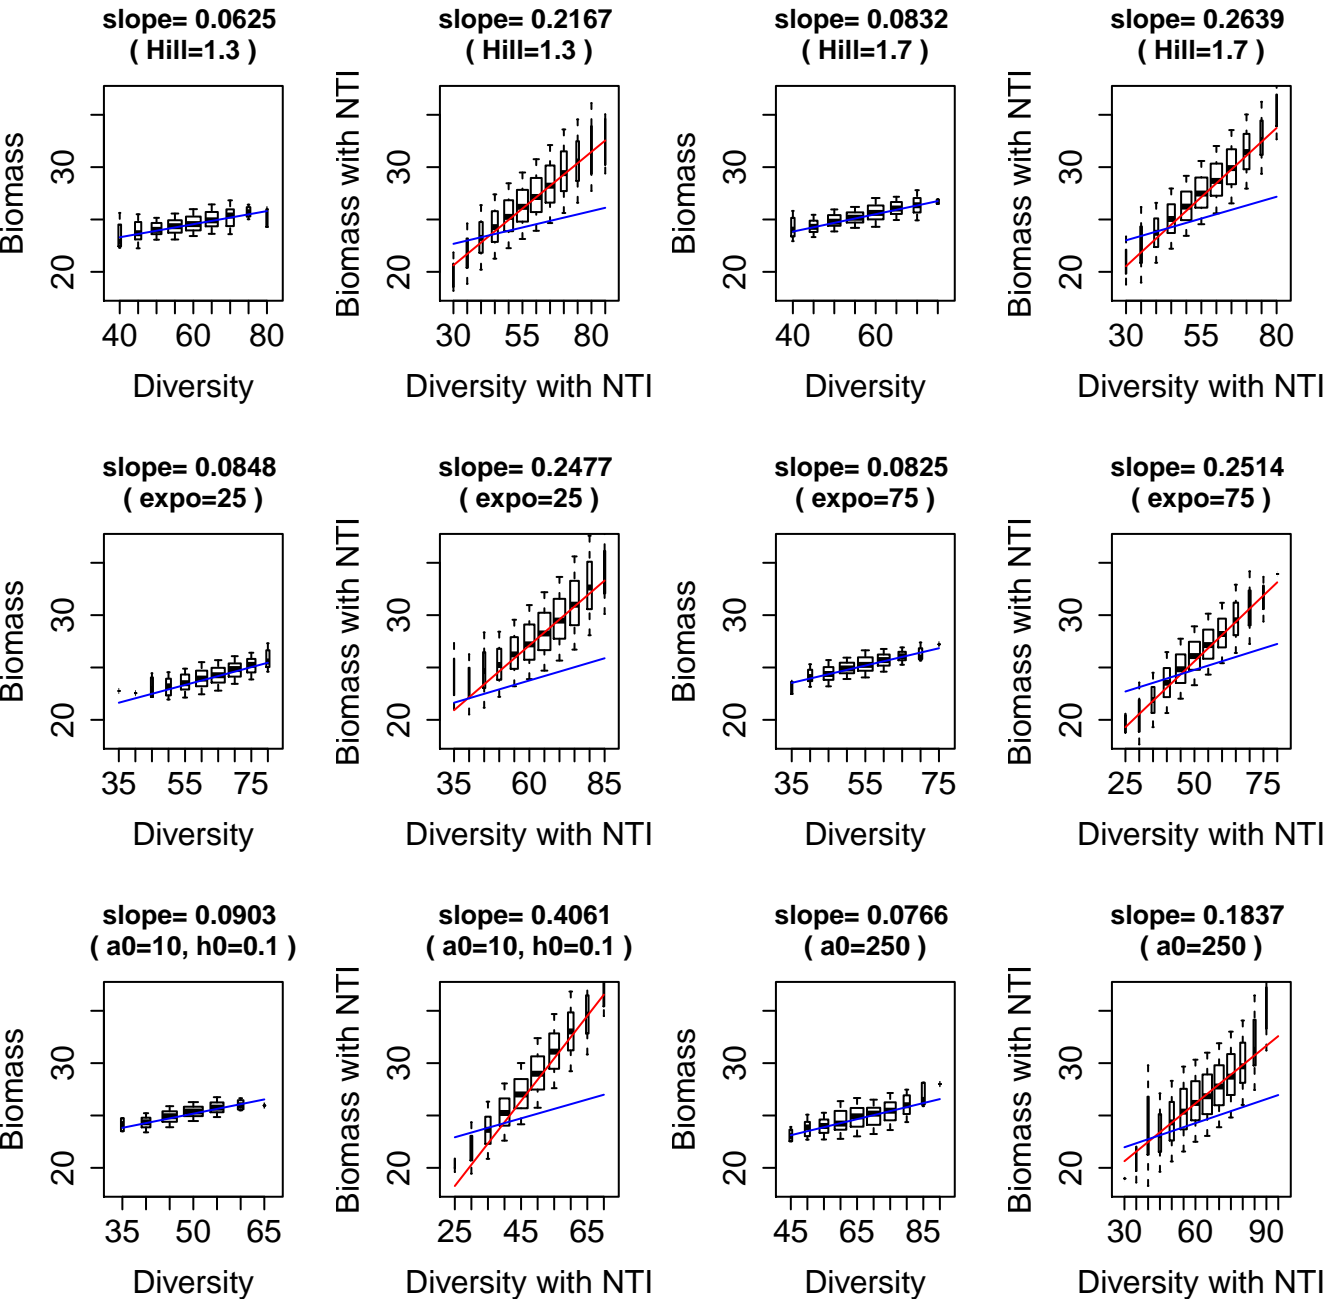

Supplement: pcbi.1007269.s005.pdf [file pcbi.1007269.s005.pdf]
